# Supplementary material for: Infrared induced repeatable self-healing and removability of mechanically enhanced graphene–epoxy flexible materials
Source: Royal Society of Chemistry journal article supplement (doi:10.1039/c9ra00261h), 2019-01-01
Supplement: c9ra00261h1.pdf [file c9ra00261h1.pdf]

## Infrared Induced Repeatable Self-Healing and Removability of Mechanical Enhanced Graphene-Epoxy Flexible materials

Y. K. Guo,<sup>a</sup> D. L. Zou,<sup>b</sup> W. Q. Zhu,<sup>c</sup> X. J. Yang,<sup>a</sup> P. Zhao,<sup>d</sup> C. A. Chen<sup>\*a</sup> and M. B. Shuai<sup>\*b</sup>

### The comparison of the prepared self-healing epoxy polymers in this paper with other conventional epoxy polymer

The physical, mechanical, self-healing and removable properties of a series of epoxy polymers were evaluated and shown in **Table 1**. The stoichiometric ratios of epoxide groups and amine curing agents in all of the epoxy polymers were fixed to 1:1. The molar ratio of FDB and OGE in FDB/OGE/D230 and GNS/FDB/OGE/D230 epoxy polymers was 1: 1.5. The content of GNS fillers in GNS/FDB/OGE/D230 epoxy polymer was 0.5 wt%. The tensile strength and elongation at break for DGEBA/DETA, FDB/D230 and OGE/D230 were not evaluated.

**Table.1** The properties of different epoxy polymers and GNS/epoxy composites.

| Epoxy polymers        | DGEBA/DETA                           | FDB/D230  | OGE/D230  | FDB/OGE/<br>D230 | GNS/FDB/O<br>GE/D230 |            |
|-----------------------|--------------------------------------|-----------|-----------|------------------|----------------------|------------|
| $T_g$ (°C)            | 63                                   | 94        | 17        | 47               | 52                   |            |
| Mechanical properties | Shear strength (MPa)                 | 1.48±0.14 | 1.25±0.15 | 2.12±0.23        | 10.96±0.32           | 17.63±0.21 |
|                       | Tensile strength (MPa)               | -----     | -----     | -----            | 9.57±0.41            | 14.52±0.45 |
|                       | Elongation at break (%)              | -----     | -----     | -----            | 315.8±13.9           | 187.6±15.2 |
| Recyclability         | 120 °C for 30 min                    | no        | yes       | no               | yes                  | yes        |
|                       | IR light heating                     | no        | no        | no               | no                   | yes        |
| Healing properties    | 70 °C for 24 h                       | no        | no        | no               | yes                  | yes        |
|                       | 120 °C for 30 min and 70 °C for 24 h | no        | yes       | no               | yes                  | yes        |
|                       | IR light heating                     | no        | no        | no               | no                   | yes        |

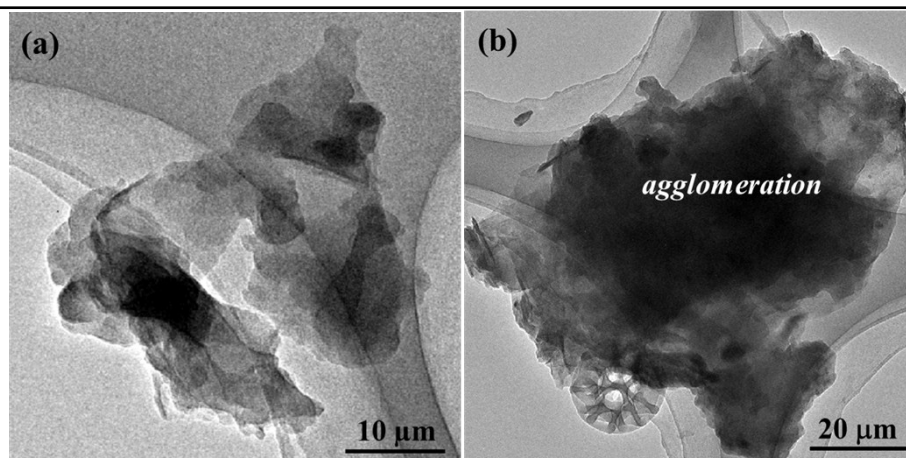

**Fig.S1** TEM graph of GNS/FDB/OGE/D230 epoxy composites filled with 0.5 wt% GNS (a) and 0.7 wt% GNS fillers(b).
